# Supplementary material for: A ring-closing metathesis-mediated route to novel enantiopure conformationally restricted cyclic amino acids
Source: Royal Society of Chemistry journal article supplement (doi:10.1039/b001253j), 2000-01-01
Supplement: b001253j.doc [file b001253j.doc]

# Supporting Information

A ring-closing metathesis-mediated route to novel

conformationally restricted cyclic amino acids

Kim C. M. F. Tjen, Sape S. Kinderman, Hans E. Schoemaker,

Henk Hiemstra and Floris P. J. T. Rutjes*

*7 (major diastereoisomer)*: IR (film)  2919, 2850, 1750, 1531, 1319, 1173, 1056 cm–1; 1H NMR (CDCl3, 400 MHz)  1.76 (ddd, *J* = 14.5, 5.4, 3.6 Hz, 1H), 2.79 (dd, *J* = 2.2, 14.5 Hz, 1H), 3.38 (s, 3H), 3.84 (br s, 1H), 4.41 (s, 2H), 4.83 (dd, *J* = 1.4, 5.5 Hz, 1H), 5.28-5.32 (m, 1H), 6.88 (d, *J* = 8.3 Hz, 1H), 7.22–7.31 (m, 5H), 8.01 (d, *J* = 8.9 Hz, 2H), 8.36 (d, *J* = 8.9 Hz, 2H); 13C NMR (CDCl3, 100 MHz)  29.5, 52.1, 52.2, 64.5, 69.4, 106.4, 124.2, 126.0, 127.5, 127.6, 128.2, 128.4, 137.7, 144.5, 150.1, 169.2; HRMS (FAB) calcd. for C20H20N2O7S (M + H): 455.0889, found 455.0887.

*9*:mp: 119–120 °C; []D +21.0 (*c* = 1, CH2Cl2); IR (film)  1711, 1531, 1351, 1168 cm–1; 1H NMR (CDCl3, 400 MHz)  2.60-2.62 (m, 2H), 3.52 (s, 3H), 3.79 (d, *J* = 16.7, 1H), 4.12 (d, *J* = 16.7 Hz, 1H), 4.90 (dd, *J* = 3.1, 5.0 Hz, 1H), 5.64–5.77 (m, 2H), 7.96 (d, *J* = 8.8 Hz, 2H), 8.34 (d, *J* = 8.8 Hz, 2H); 13C NMR (CDCl3, 100 MHz)  27.6, 42.1, 52.2, 52.9, 122.4, 122.7, 123.9, 128.3, 144.6, 150.0, 170.1; HRMS (FAB) calcd. for C13H15N2O6S (M + H): 327.0651, found 327.0650.

*11*:mp: 113–114 °C; []D +59.1 (*c* = 1, CH2Cl2); IR (film)  3105, 2953, 1741.9, 1531, 1216, 1095, 923 cm–1; 1H NMR (CDCl3, 400 MHz)  2.01-2.08 (m, 1H), 2.22 (dt, *J* = 9.0, 13.6 Hz, 1H), 2.48–2.55 (m, 1H), 2.64 (dd, *J* = 5.8, 17.8 Hz, 1H), 3.72 (s, 3H), 4.26-4.30 (m, 1H), 4.83 (d, *J* = 6.3 Hz, 1H), 5.06-5.10 (m, 2H), 5.66-5.84 (m, 3H), 8.1 (d, *J* = 8.8 Hz, 2H), 8.4 (d, *J* = 8.8 Hz, 2H); 13C NMR (CDCl3, 100 MHz)  24.0, 40.2, 51.6, 52.3, 53.4, 118.0, 122.6, 124.0, 125.4, 128.1, 133.7, 146.0, 149.8, 170.7; HRMS (FAB) calcd. for C16H19NO6S (M + H): 367.0964, found 367.0975

*16*: mp: 198.5–200 °C; []D –109.8 (*c* = 0.5, H2O); IR (KBr)  3300, 2979, 2808, 1624, 1573 cm–1; 1H NMR (D2O, 400 MHz)  2.35-2.25 (m, 3H), 2.69 (br d, *J* = 18.5 Hz, 1H), 3.81 (dd, *J* = 5.2, 12,0 Hz, 1H), 4.00 (br s, 1H), 5.28-5.33 (m, 2H), 5.73 (d, *J* = 10.4 Hz, 1H), 5.81-5.91 (m, 1H), 6.00-6.04 (m, 1H); 13C NMR (D2O, 50 MHz)  27.8, 38.6, 55.5, 58.1, 122.2, 125.8, 127.7, 133.7, 175.9; HRMS (FAB) calcd. for C9H14NO2 (M + H): 168.1025, found 168.1020.
